# Supplementary material for: Comparison of the MGISEQ-2000 and Illumina HiSeq 4000 sequencing platforms for RNA sequencing
Source: PubMed Central journal article supplement (PMC6808641; doi:10.5808/gi.2019.17.3.e32), 2019-09-27

Supplementary Figure 1

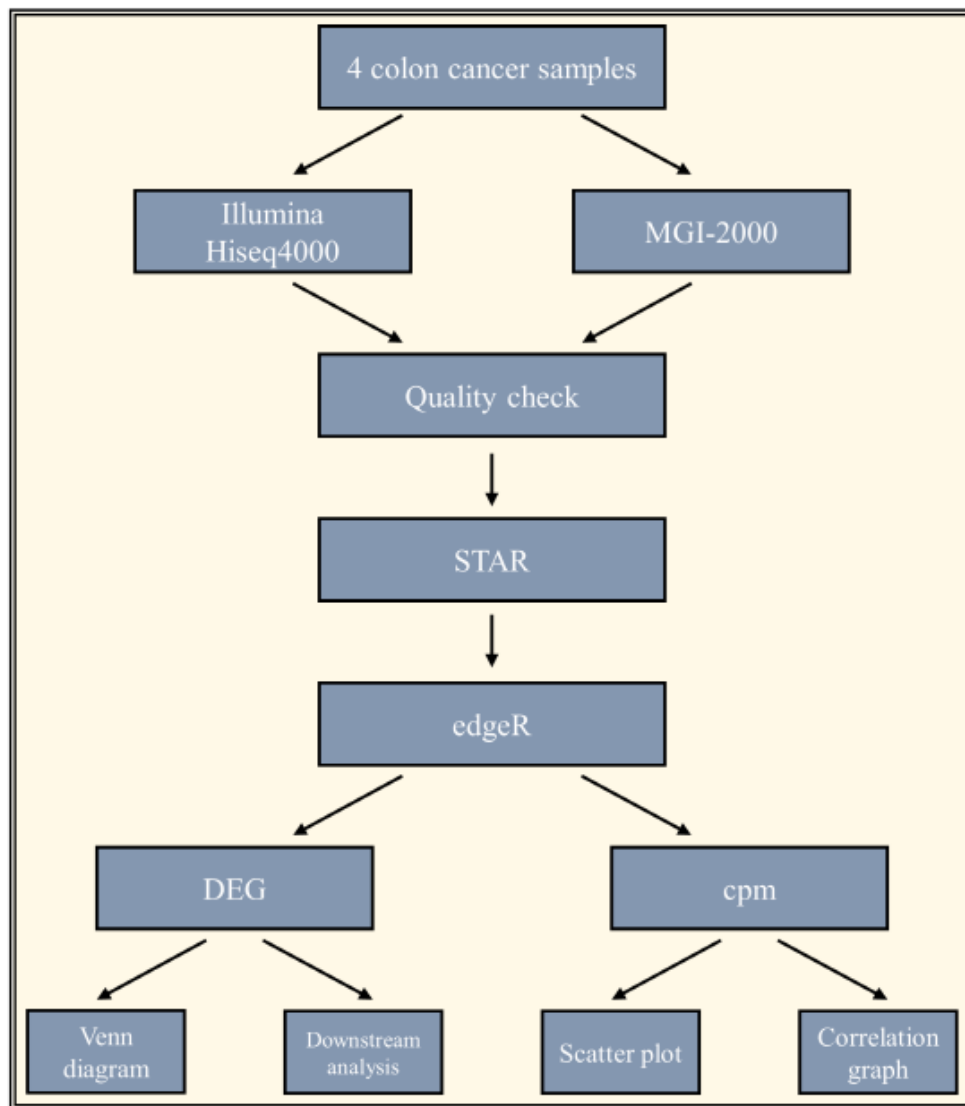

Supplement: gi-2019-17-3-e32-suppl1.pdf [file gi-2019-17-3-e32-suppl1.pdf]
